# Supplementary material
Source: PubMed Central journal article supplement (PMC2888816)
Supplement: NIHMS132533-supplement-1_si_001.pdf [file NIHMS132533-supplement-1_si_001.pdf]

**SUPPLEMENTAL INFORMATION for**  
**Stoichiometry and energetics of poly(amidoamine)**  
**dendrimer-phospholipid interactions**

Christopher V. Kelly<sup>1,2,3,4</sup>, Meghan G. Liroff<sup>4,5</sup>, L. Devon Triplett<sup>1,4</sup>,  
Pascale R. Leroueil<sup>4,5</sup>, Douglas G. Mullen<sup>4,6</sup>, Joseph M. Wallace<sup>5</sup>, Sasha Meshinchi<sup>7</sup>,  
James R. Baker, Jr.<sup>4,8</sup>, Bradford G. Orr<sup>1,4,9,\*</sup>, and Mark M. Banaszak Holl<sup>1,2,3,4,5,6,\*</sup>

**AUTHOR ADDRESS**

1 Applied Physics Program, 2 Biophysics, 3 Graham Environmental Sustainability Institute, 4 Michigan Nanotechnology Institute for Medicine and Biological Sciences, 5 Department of Chemistry, 6 Macromolecular Science and Engineering, 7 Microscopy and Image Analysis Laboratory, 8 Department of Internal Medicine, and 9 Department of Physics, University of Michigan, Ann Arbor, MI, USA

**AUTHOR EMAIL ADDRESS** orr@umich.edu, mbanasza@umich.edu

**RECEIVED DATE**

**TITLE RUNNING HEAD** Stoichiometry and Energetics of PAMAM and phospholipids

**CORRESPONDING AUTHOR FOOTNOTE \***

930 North University Ave., University of Michigan, Ann Arbor, MI 48109

Phone: 734-763-2283, Fax: 734-764-3323

## FIGURES

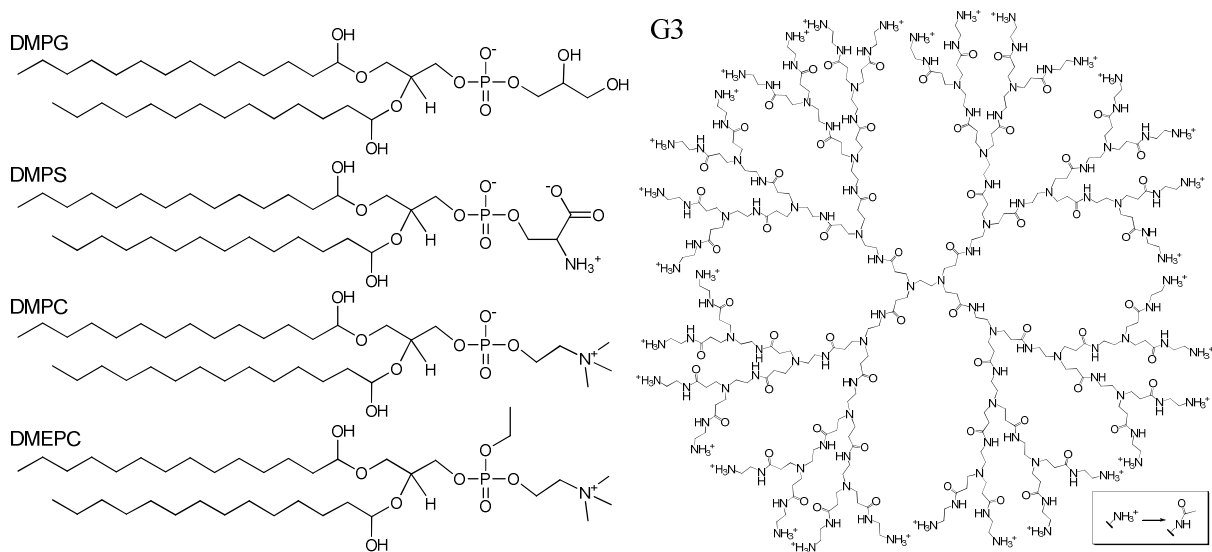

Figure S1: Molecular structure of the phospholipids and PAMAM dendrimer used in this study. The PAMAM dendrimer contains protonated primary amines at pH 7.4. To reduce the total charge on the dendrimer, the terminal amines may be acetylated, as shown in the inset.<sup>1</sup>

Table S1: Lipid and dendrimer properties.

| <b>Lipid</b>           | <b>Net Charge (<i>e</i>)</b> | <b>T<sub>m</sub> (°C)</b>                      |
|------------------------|------------------------------|------------------------------------------------|
| <b>DMPG</b>            | -1                           | 23                                             |
| <b>DMPS</b>            | -1                           | 35                                             |
| <b>DMPC</b>            | 0                            | 23                                             |
| <b>DMEPC</b>           | +1                           | 24                                             |
| <b>PAMAM Dendrimer</b> | <b>Mass (kD)<sup>a</sup></b> | <b>Dendrimer Charge (<i>e</i>)<sup>b</sup></b> |
| <b>G5-Ac(100%)</b>     | 32                           | 0                                              |
| <b>G3</b>              | 6.9                          | 31                                             |
| <b>G5-Ac(40%)</b>      | 29                           | 70                                             |
| <b>G5</b>              | 27                           | 112                                            |
| <b>G6</b>              | 46                           | 187                                            |
| <b>G7</b>              | 106                          | 450                                            |
| <b>G8</b>              | 260                          | 1090                                           |
| <b>G9</b>              | 428                          | 1880                                           |

<sup>a</sup> Determined by gas phase chromatography with 5% uncertainty.

<sup>b</sup> Equal to the number of primary amines per dendrimer at pH 7, as determined by acid-base titrations with 5% uncertainty.<sup>2</sup>

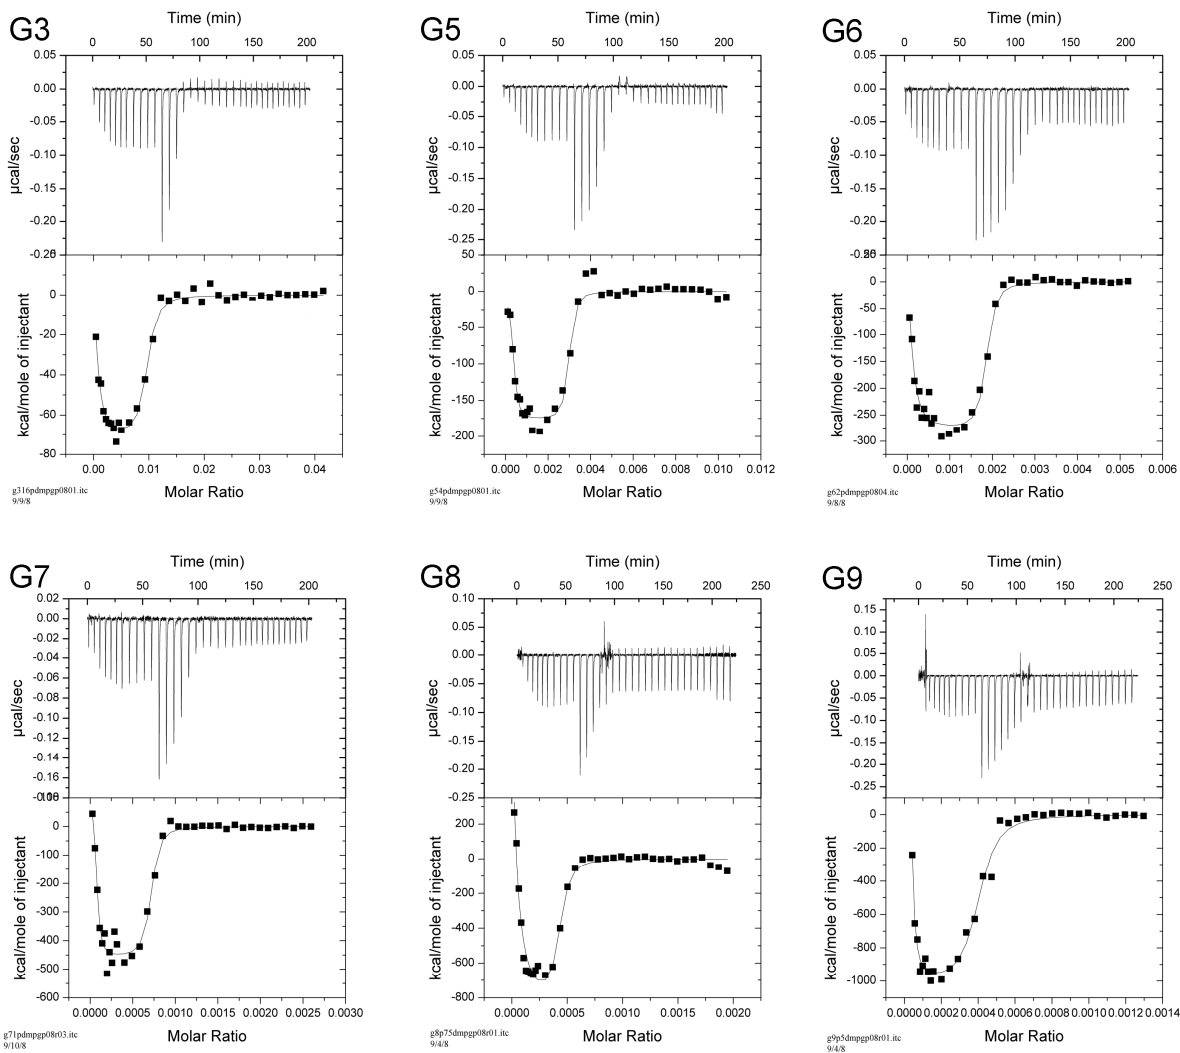

Figure S2: Power vs. time data and  $\Delta H$  vs. molar ratio from ITC for PAMAM dendrimers titrated into DMPG SUVs at 50°C in PBS.

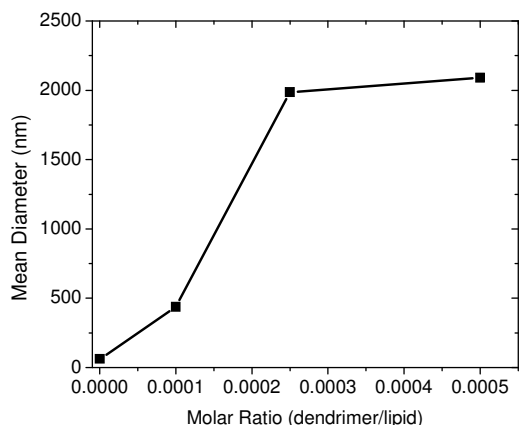

Figure S3: Mean diameter of G5-DMPS mixtures as measured with dynamic light scattering (DLS). DMPS was prepared as SUVs and G5 was titrated into the sample to the indicated molar ratio. This data was collected at 50 °C in PBS. Similar data has been obtained for G3, G5, G8 in DMPG (not shown). The flocculation and aggregation at higher dendrimer/lipid ratios yields particle sizes too large for DLS analysis, as visible by eye.

Dynamic light scattering (DLS) was performed on a Nanosizer ZS (Malvern Instruments Ltd.). Samples were prepared in a semi-micro cuvette to a volume of 0.5 mL and varying molar ratios. Samples were in PBS, stirred and 50 °C for > 5 min before measurement, and 50 °C during measurement, to replicate ITC conditions. All samples of dendrimers and lipids were observed to aggregate as the dendrimer/lipid molar ratio increased until the DLS was unable to determine accurately the average particle size due to the aggregates. The molar ratios at which DLS was unable to determine the average particle size were approximately  $n_L$ .

Table S2: Stoichiometric comparison of ITC results and proposed dendrimer-lipid models

| PAMAM Dendrimer | $n_D^{-1}$          | $n_L^{-1}$ | Flattened-dendrimer model <sub>A,B</sub> | Dendrimer-encased vesicle model <sub>B,C</sub> |
|-----------------|---------------------|------------|------------------------------------------|------------------------------------------------|
|                 | ( lipids/dendrimer) |            |                                          |                                                |
| G3              | 76                  | 140        | <b>70</b> - <b><i>110</i></b>            | 1100 - 1200                                    |
| G5              | 240                 | 460        | <b><i>110</i></b> - <b><i>170</i></b>    | 1300 - 1500                                    |
| G6              | 410                 | 860        | 170 - 270                                | 1600 - 1900                                    |
| G7              | 1200                | 2300       | 390 - 610                                | <b><i>1900</i></b> - <b><i>2200</i></b>        |
| G8              | 1600                | 2700       | 690 - 1100                               | <b><i>2300</i></b> - <b><i>2900</i></b>        |
| G9              | 1800                | 3800       | 1100 - 1700                              | <b><i>3000</i></b> - <b><i>3800</i></b>        |

<sup>A</sup> Assuming a lipid density of 0.58 nm<sup>2</sup>/lipid/monolayer and the maximum dendrimer extension on the surface equals that observed on mica under water.<sup>3</sup>

<sup>B</sup> Numbers in bold and italics indicate a general agreement between the model and the ITC-determined stoichiometries.

<sup>C</sup> Analogous to an estimate by Mecke et al.<sup>4</sup> with the minimum dendrimer radius equal to that observed in simulations.

## REFERENCES

1. Majoros, I. J.; Keszler, B.; Woehler, S.; Bull, T.; Baker, J. R., Acetylation of poly(amidoamine) dendrimers. *Macromolecules* **2003**, 36, (15), 5526-5529.
2. Majoros, I. J.; Thomas, T. P.; Mehta, C. B.; Baker, J. R., Poly(amidoamine) dendrimer-based multifunctional engineered nanodevice for cancer therapy. *Journal of Medicinal Chemistry* **2005**, 48, (19), 5892-5899.
3. Garidel, P.; Blume, A., 1,2-Dimyristoyl-sn-glycero-3-phosphoglycerol (DMPG) monolayers: influence of temperature, pH, ionic strength and binding of alkaline earth cations. *Chemistry and Physics of Lipids* **2005**, 138, (1-2), 50-59.
4. Mecke, A.; Majoros, I. J.; Patri, A. K.; Baker, J. R.; Holl, M. M. B.; Orr, B. G., Lipid bilayer disruption by polycationic polymers: The roles of size and chemical functional group. *Langmuir* **2005**, 21, (23), 10348-10354.
